# Supplementary material for: Direct and indirect oxidation removal of chloride ions from sulfuric acid wastewater using photoactivated PMS/PS: efficiency and mechanism
Source: Royal Society of Chemistry journal article supplement (doi:10.1039/d3ew00858d), 2024-01-01
Supplement: d3ew00858d1.pdf [file d3ew00858d1.pdf]

## Supplementary Material

### Direct and indirect oxidation removal of chloride ion from sulfuric acid wastewater using photoactivated PMS/PS: Efficiency and mechanism

Wenyue Dou<sup>a\*</sup>, Dong Li<sup>b</sup>, Jiaqi Wu<sup>a</sup>, Kaili Zhu<sup>a</sup>, Chenyang Wu<sup>a</sup>, Linghao Kong<sup>cd</sup>,

Xingyun Hu<sup>cd</sup>

- a. Jiangsu Key Laboratory of Industrial Pollution Control and Resource Reuse, School of Environmental Engineering, Xuzhou University of Technology, Xuzhou 221018, China
- b. Xuzhou Vocational College of Bioengineering, Xuzhou 221006, China
- c. State Key Laboratory of Environmental Aquatic Chemistry, Research Center for Eco-Environmental Sciences, Chinese Academy of Sciences, Beijing 100085, China
- d. Beijing Key Laboratory of Industrial Wastewater Treatment and Resource Recovery, Research Center for Eco-Environmental Sciences, Chinese Academy of Sciences, Beijing 100085, China

**\* Corresponding author:**

Wenyue Dou

- a. Jiangsu Key Laboratory of Industrial Pollution Control and Resource Reuse, School of Environmental Engineering, Xuzhou University of Technology, Xuzhou 221018, China

Tel: +86-18811380336

E-mail: [12123@xzit.edu.cn](mailto:12123@xzit.edu.cn)

The supplementary material contains 16 pages with 13 figures and 2 tables.

**Fig. S1**

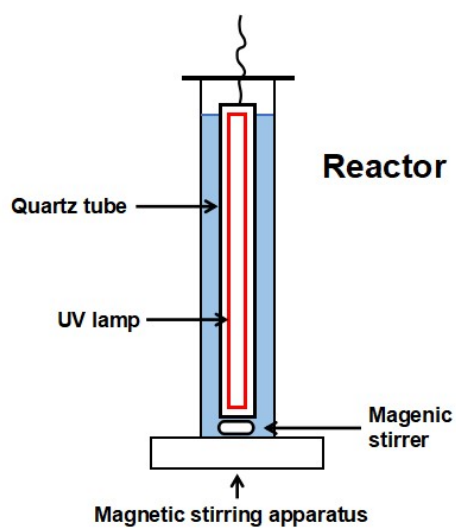

Fig. S1. Diagrammatic sketch of the submerged reactor for the Cl(-I) removal under UV.

**Fig. S2**

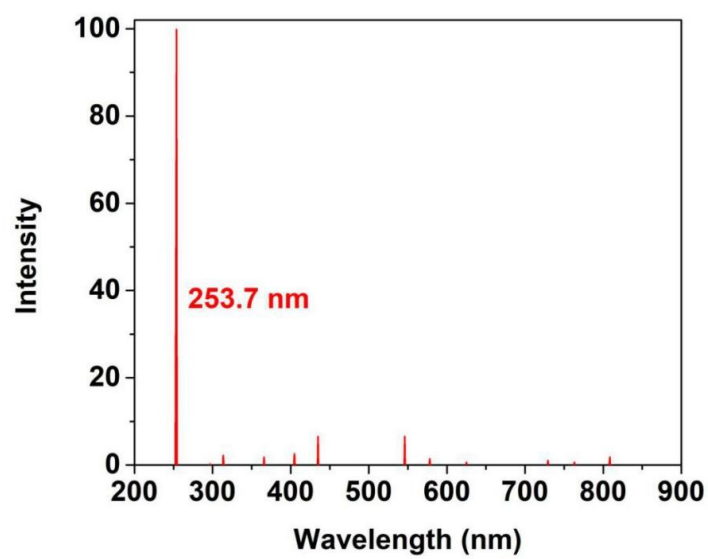

Fig. S2. The spectral distributions of the low-pressure Hg lamp used in the UV submerged reactor.

**Fig. S3**

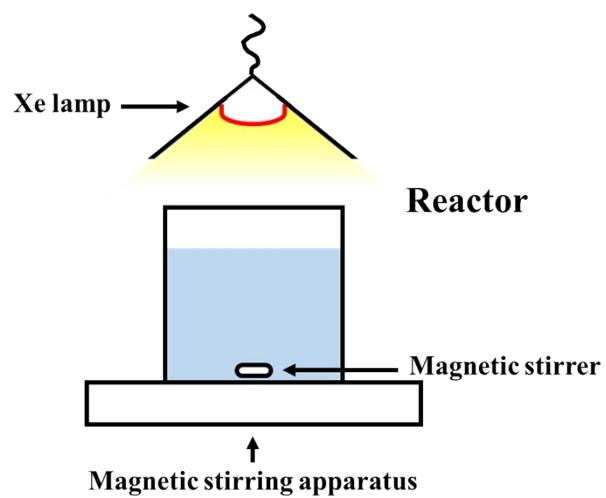

Fig. S3. Diagrammatic sketch of the reactor for the Cl(-I) removal under simulated sunlight.

Fig. S4

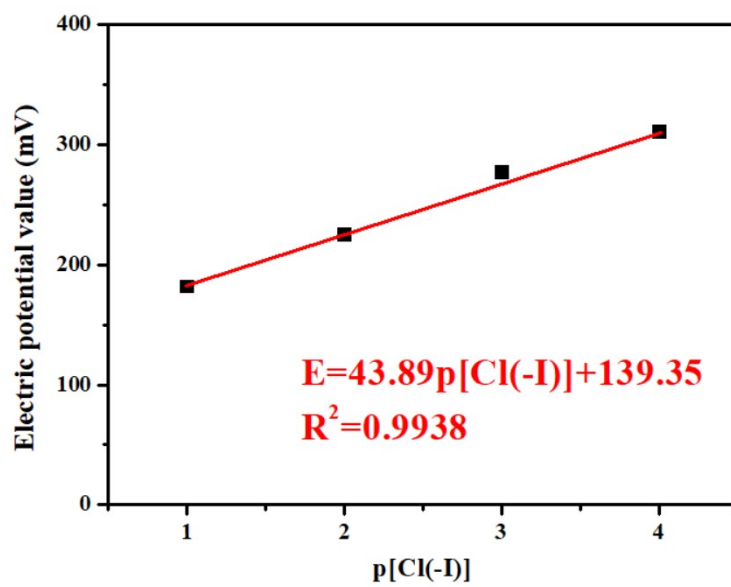

Fig. S4. Standard curve of Cl(-I).

Fig. S5

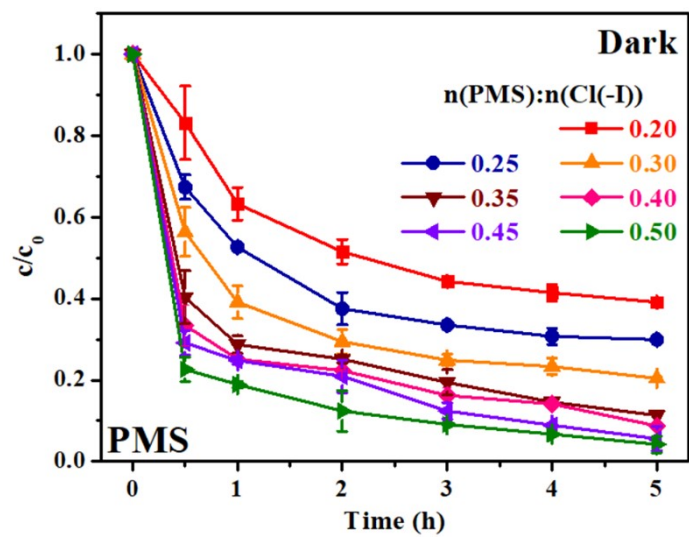

Fig. S5.  $c/c_0$  as a function of reaction time at different mole ratio of PMS to  $\text{Cl}(-\text{I})$  under dark.

Conditions:  $[\text{H}_2\text{SO}_4]=200 \text{ g/L}$ ,  $[\text{Cl}(-\text{I})]=2000 \text{ mg/L}$  and room temperature. The error bars show the standard deviation ( $n=3$ ).

Fig. S6

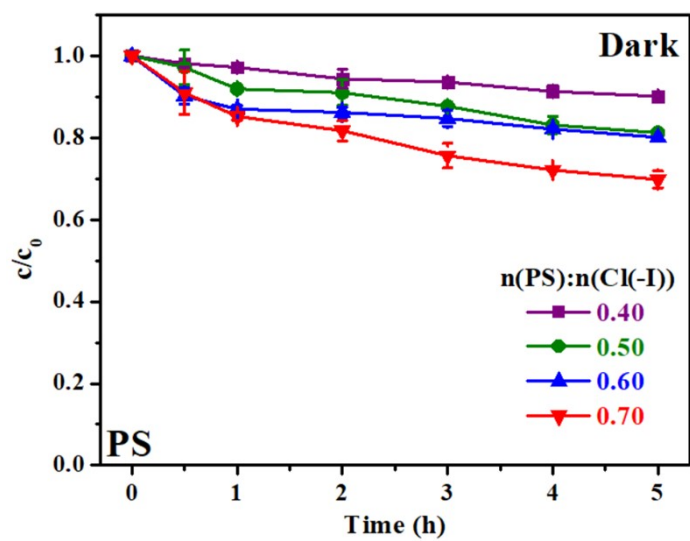

Fig. S6.  $c/c_0$  as a function of reaction time at different mole ratio of PS to Cl(-I) under dark. Conditions:  $[H_2SO_4]=200$  g/L,  $[Cl(-I)]=2000$  mg/L and room temperature. The error bars show the standard deviation ( $n=3$ ).

Fig. S7

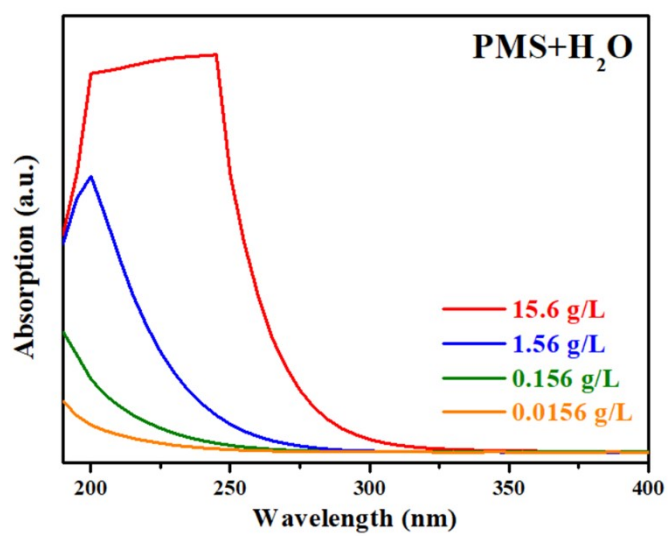

Fig. S7. UV-vis absorption spectra of the PMS solutions.



Fig. S8

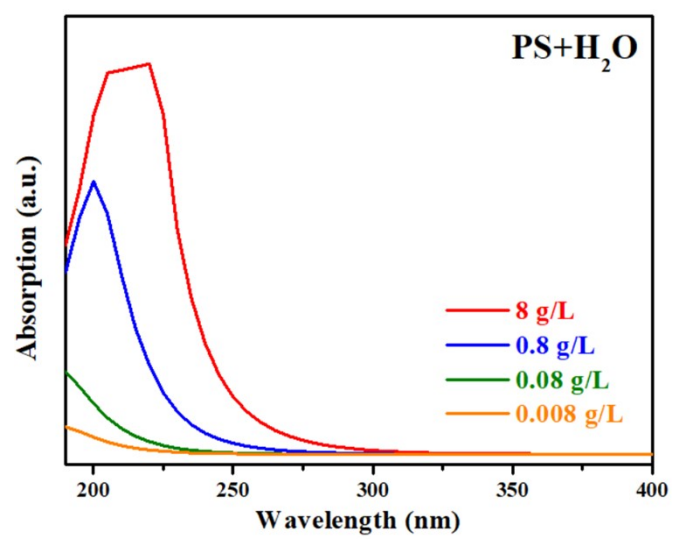

Fig. S8. UV-vis absorption spectra of the PS solutions.

**Fig. S9**

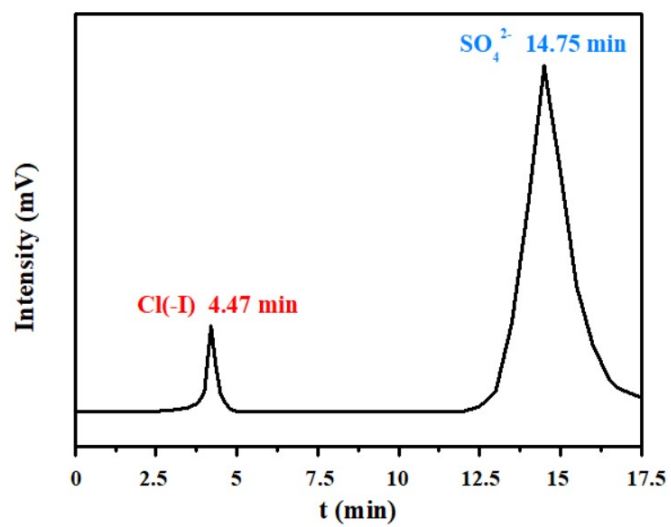

Fig. S9. The IC spectrum of the reaction system.

**Table. S1**

Table S1.  $c/c_0$  of Cl(-I) at 60 min under the single function of BQ, NB, TBA and EtOH.

| Scavenger type | $c/c_0$ |
|----------------|---------|
| BQ             | 1       |
| NB             | 1       |
| TBA            | 1       |
| EtOH           | 1       |

Conditions:  $[H_2SO_4]=200$  g/L,  $[Cl(-I)]=2000$  mg/L,  $V=500$  mL  
and  $[Scavenger]=100$  mM.

**Fig. S10**

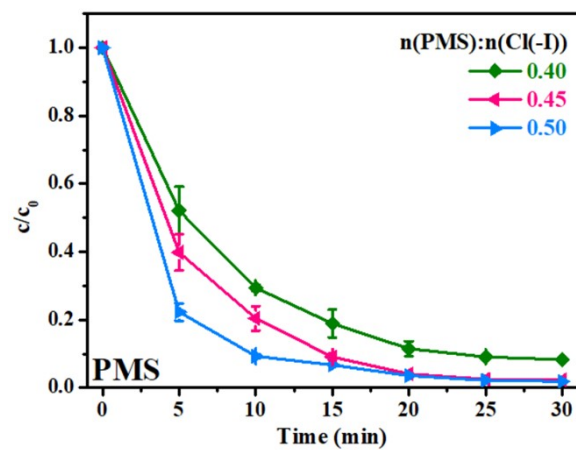

Fig. S10.  $c/c_0$  under different mole ratio of PMS to Cl(-I) as a function of time during the removal of Cl(-I) under sunlight. Conditions:  $[H_2SO_4]=200$  g/L and  $[Cl(-I)]=2000$  mg/L. The error bars show the standard deviation (n=3).

Fig. S11

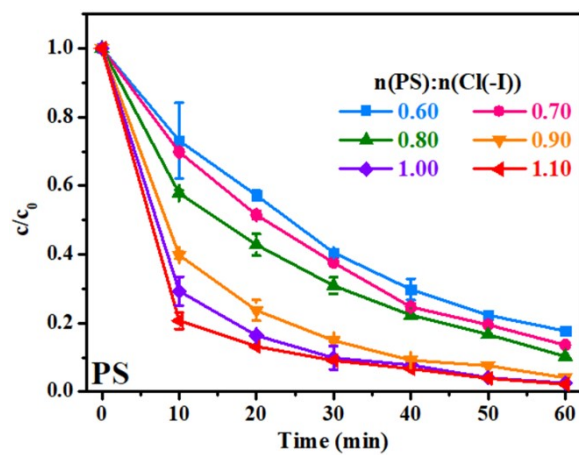

Fig. S11.  $c/c_0$  under different mole ratio of PS to  $\text{Cl}(-\text{I})$  as a function of time during the removal of  $\text{Cl}(-\text{I})$  under sunlight. Conditions:  $[\text{H}_2\text{SO}_4]=200$  g/L and  $[\text{Cl}(-\text{I})]=2000$  mg/L. The error bars show the standard deviation ( $n=3$ ).

**Table. S2**

Table S2. Composition of the actual sulfuric acid wastewater.

| <b>Composition</b>             | <b>Concentration (mg/L)</b> |                 |
|--------------------------------|-----------------------------|-----------------|
|                                | Lead-zinc smelting          | Copper smelting |
| H <sub>2</sub> SO <sub>4</sub> | 214000                      | 178000          |
| F                              | 114                         | 775             |
| Cl                             | 1735                        | 1952            |
| Cu                             | 32.4                        | 23.6            |
| Pb                             | 4.3                         | 21.2            |
| Zn                             | 313                         | 39.7            |
| Hg                             | 1.17                        | 0.51            |
| Cd                             | 3.19                        | 11.5            |
| As                             | 97.3                        | 511             |

Fig. S12

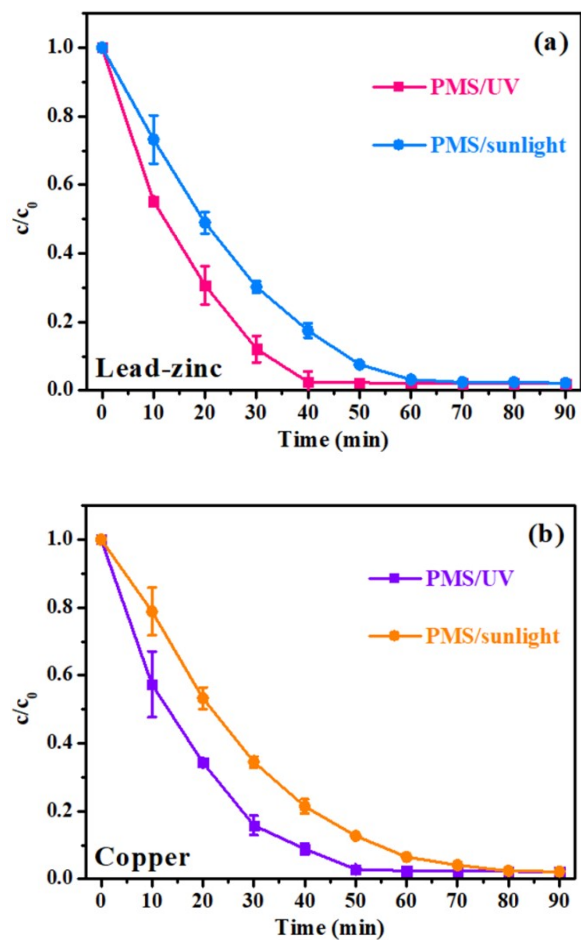

Fig. S12.  $c/c_0$  of  $\text{Cl}(-\text{I})$  during the treatment of the actual wastewater obtained from the lead-zinc

(a) and copper (b) smelting enterprises by PMS as a function of time. Conditions:

$n(\text{PMS}):n(\text{Cl}(-\text{I}))=0.45$ . The error bars show the standard deviation ( $n=3$ ).

Fig. S13

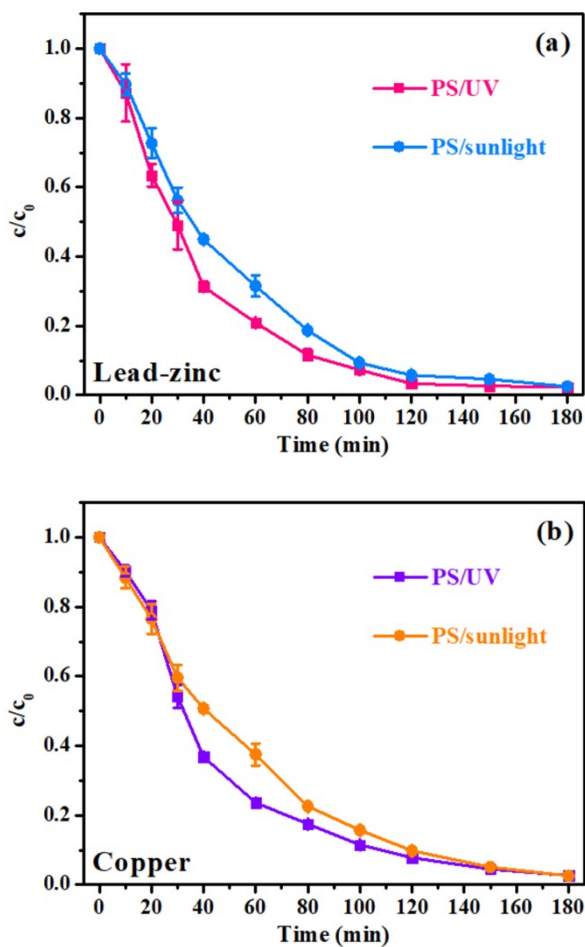

Fig. S13.  $c/c_0$  of  $\text{Cl}(-\text{I})$  during the treatment of the actual wastewater obtained from the lead-zinc (a) and copper (b) smelting enterprises by PS as a function of time. Conditions:  $n(\text{PS}):n(\text{Cl}(-\text{I}))=0.60$  under UV and  $n(\text{PS}):n(\text{Cl}(-\text{I}))=1.00$  under sunlight. The error bars show the standard deviation ( $n=3$ ).
